# Supplementary material for: Dumpster diving for diatom plastid 16S rRNA genes
Source: PeerJ. 2021 Jul 1;9:e11576. doi: 10.7717/peerj.11576 (PMC8255066; doi:10.7717/peerj.11576)
Supplement: Supplemental Information 2 [file peerj-09-11576-s002.xlsx]

## Sheet: S2
Run	Sample	# Raw Sequences	# Sequences Passed Bioinformatic Pipeline	# Bacterial Sequences	# Chloroplast Sequences
SRR10445439	PU1.1	78165	67948	51857	7969
SRR10445438	PU1.2	91289	74172	48160	8748
SRR10445327	PU1.3	42913	38539	27139	3576
SRR10445300	PU1.4	91263	80839	55393	10003
SRR10445289	PU1.5	72377	65614	49447	7221
SRR10445278	PU1.6	47003	42401	33267	3512
SRR10445267	PU1.7	101797	89104	75321	6719
SRR10445256	PU1.8	72778	65419	52433	4936
SRR10445245	PU1.9	53200	48655	38977	3801
SRR10445283	B1.1	119847	115693	27983	38307
SRR10445282	B1.2	127315	122360	30098	41624
SRR10445281	B1.3	70876	66565	25999	21364
SRR10445280	B1.4	83957	75345	31300	19875
SRR10445279	B1.5	66328	59751	29722	14772
SRR10445277	B1.6	91488	82731	28450	25221
SRR10445276	B1.7	93714	84260	37484	24192
SRR10445275	B1.8	54899	50597	21857	14114
SRR10445274	B1.9	80124	73719	26569	21582
SRR10445234	PU2.1	79822	69022	61733	3805
SRR10445437	PU2.2	88927	76929	67725	4994
SRR10445426	PU2.3	38383	34123	28194	2420
SRR10445415	PU2.4	68804	61556	54525	2423
SRR10445404	PU2.5	54760	49614	36292	4359
SRR10445393	PU2.6	101409	89027	66175	6842
SRR10445382	PU2.7	76671	66916	44075	6313
SRR10445371	PU2.8	59575	52716	38668	3380
SRR10445360	PU2.9	87734	77461	58691	5320
SRR10445273	B2.1	85632	74360	45159	22613
SRR10445272	B2.2	140376	135323	39286	31235
SRR10445271	B2.3	84910	79845	25989	19284
SRR10445270	B2.4	87462	80308	42808	9275
SRR10445269	B2.5	43006	39740	21649	6339
SRR10445268	B2.6	80378	73944	35514	12202
SRR10445266	B2.7	104446	94045	52996	13639
SRR10445265	B2.8	47441	42881	29130	5072
SRR10445264	B2.9	93118	83607	52204	11756
SRR10445349	PD3.1	83657	77145	50451	17390
SRR10445338	PD3.2	86025	77829	49790	17358
SRR10445326	PD3.3	70548	63421	41422	14315
SRR10445315	PD3.4	72556	65427	38002	13341
SRR10445308	PD3.5	55848	50356	36195	6409
SRR10445307	PD3.6	38933	35068	24556	3777
SRR10445306	PD3.7	78893	68971	48865	9081
SRR10445305	PD3.8	50987	45309	35741	5040
SRR10445304	PD3.9	64573	57215	45033	6432
SRR10445263	B3.1	149850	143532	30018	41579
SRR10445262	B3.2	116983	112290	33424	31191
SRR10445261	B3.3	77835	72960	24014	21179
SRR10445260	B3.4	93984	87248	36254	17773
SRR10445259	B3.5	48034	44540	19247	7853
SRR10445258	B3.6	72003	64964	36083	10654
SRR10445257	B3.7	84612	76552	39651	12857
SRR10445255	B3.8	50314	44313	36226	3438
SRR10445254	B3.9	63530	56346	42711	6446
SRR10445303	PD4.1	91903	81188	59205	10994
SRR10445302	PD4.2	89333	79620	54015	12438
SRR10445301	PD4.3	86462	75228	54183	11341
SRR10445299	PD4.4	70948	64267	42334	13503
SRR10445298	PD4.5	51315	45519	31361	6807
SRR10445297	PD4.6	54692	47664	29873	10899
SRR10445296	PD4.7	80915	72313	52252	9152
SRR10445295	PD4.8	52653	47845	36488	5816
SRR10445294	PD4.9	75777	67837	41810	10646
SRR10445293	PD5.1	92877	80721	50936	16247
SRR10445292	PD5.2	89505	80119	45125	15453
SRR10445291	PD5.3	50824	44806	28685	6008
SRR10445290	PD5.4	63143	54853	33028	8921
SRR10445288	PD5.5	58374	51416	33046	7726
SRR10445287	PD5.6	34222	30175	20933	3839
SRR10445286	PD5.7	62221	54392	37302	7395
SRR10445285	PD5.8	57934	49948	34432	7651
SRR10445284	PD5.9	66640	59165	31900	10539

## Sheet: S3
OTU	PhytoREF Taxonomy	Percent homology
1	Kingdom.Eukaryota;Supergroup.Stramenopiles;Phylum.Ochrophyta;Class.Bacillariophyta;Subclass.Bacillariophyta_X;Order.Naviculales;Suborder.Naviculales_X	0.714314
6	Kingdom.Eukaryota;Supergroup.Stramenopiles;Phylum.Ochrophyta;Class.Bacillariophyta;Subclass.Bacillariophyta_X;Order.Chaetocerotales;Suborder.Chaetocerotales_X;Family.Chaetocerotaceae;Genus.Chaetoceros;Species.Chaetoceros	0.885636
8	Kingdom.Eukaryota;Supergroup.Stramenopiles;Phylum.Ochrophyta;Class.Bacillariophyta;Subclass.Bacillariophyta_X	0.848084
19	Kingdom.Eukaryota;Supergroup.Stramenopiles;Phylum.Ochrophyta;Class.Bacillariophyta;Subclass.Bacillariophyta_X	0.831275
30	Kingdom.Eukaryota;Supergroup.Stramenopiles;Phylum.Ochrophyta;Class.Bacillariophyta	0.999999
33	Kingdom.Eukaryota;Supergroup.Stramenopiles;Phylum.Ochrophyta;Class.Bacillariophyta;Subclass.Bacillariophyta_X	0.784385
42	Kingdom.Eukaryota;Supergroup.Stramenopiles;Phylum.Ochrophyta;Class.Bacillariophyta;Subclass.Bacillariophyta_X;Order.Naviculales;Suborder.Naviculales_X	0.722283
88	Kingdom.Eukaryota;Supergroup.Stramenopiles;Phylum.Ochrophyta;Class.Bacillariophyta;Subclass.Bacillariophyta_X;Order.Bacillariophyta_XX;Suborder.Bacillariophyta_XXX	0.979123
89	Kingdom.Eukaryota;Supergroup.Stramenopiles;Phylum.Ochrophyta;Class.Bacillariophyta;Subclass.Bacillariophyta_X	0.900422
100	Kingdom.Eukaryota;Supergroup.Stramenopiles;Phylum.Ochrophyta;Class.Bacillariophyta;Subclass.Bacillariophyta_X	0.820284
102	Kingdom.Eukaryota;Supergroup.Stramenopiles;Phylum.Ochrophyta;Class.Bacillariophyta	0.999999
104	Kingdom.Eukaryota;Supergroup.Stramenopiles;Phylum.Ochrophyta;Class.Bacillariophyta;Subclass.Bacillariophyta_X	0.881058
166	Kingdom.Eukaryota;Supergroup.Stramenopiles;Phylum.Ochrophyta;Class.Bacillariophyta	0.999981
230	Kingdom.Eukaryota;Supergroup.Stramenopiles;Phylum.Ochrophyta;Class.Bacillariophyta;Subclass.Bacillariophyta_X;Order.Bacillariophyta_XX;Suborder.Bacillariophyta_XXX	0.973212
342	Kingdom.Eukaryota;Supergroup.Stramenopiles;Phylum.Ochrophyta;Class.Bacillariophyta;Subclass.Bacillariophyta_X	0.789135
357	Kingdom.Eukaryota;Supergroup.Stramenopiles;Phylum.Ochrophyta;Class.Bacillariophyta	0.999956
479	Kingdom.Eukaryota;Supergroup.Stramenopiles;Phylum.Ochrophyta;Class.Bacillariophyta;Subclass.Bacillariophyta_X	0.72919
642	Kingdom.Eukaryota;Supergroup.Stramenopiles;Phylum.Ochrophyta;Class.Bacillariophyta;Subclass.Bacillariophyta_X	0.836717
738	Kingdom.Eukaryota;Supergroup.Stramenopiles;Phylum.Ochrophyta;Class.Bacillariophyta;Subclass.Bacillariophyta_X;Order.Surirellales;Suborder.Surirellales_X;Family.Surirellaceae;Genus.Psammodictyon;Species.Psammodictyon	0.886519
1221	Kingdom.Eukaryota;Supergroup.Stramenopiles;Phylum.Ochrophyta;Class.Bacillariophyta;Subclass.Bacillariophyta_X	0.821442
1364	Kingdom.Eukaryota;Supergroup.Stramenopiles;Phylum.Ochrophyta;Class.Bacillariophyta;Subclass.Bacillariophyta_X	0.882223
1714	Kingdom.Eukaryota;Supergroup.Stramenopiles;Phylum.Ochrophyta;Class.Bacillariophyta;Subclass.Bacillariophyta_X	0.797352
1928	Kingdom.Eukaryota;Supergroup.Stramenopiles;Phylum.Ochrophyta;Class.Bacillariophyta;Subclass.Bacillariophyta_X	0.773546
2482	Kingdom.Eukaryota;Supergroup.Stramenopiles;Phylum.Ochrophyta;Class.Bacillariophyta;Subclass.Bacillariophyta_X	0.825521
2769	Kingdom.Eukaryota;Supergroup.Stramenopiles;Phylum.Ochrophyta;Class.Bacillariophyta;Subclass.Bacillariophyta_X;Order.Naviculales;Suborder.Naviculales_X;Family.Naviculaceae;Genus.Navicula;Species.Navicula	0.882044
3610	Kingdom.Eukaryota;Supergroup.Stramenopiles;Phylum.Ochrophyta;Class.Bacillariophyta	0.999998
3866	Kingdom.Eukaryota;Supergroup.Stramenopiles;Phylum.Ochrophyta;Class.Bacillariophyta	0.999917
4471	Kingdom.Eukaryota;Supergroup.Stramenopiles;Phylum.Ochrophyta;Class.Bacillariophyta	0.999985
4485	Kingdom.Eukaryota;Supergroup.Stramenopiles;Phylum.Ochrophyta;Class.Bacillariophyta;Subclass.Bacillariophyta_X	0.931467
4583	Kingdom.Eukaryota;Supergroup.Stramenopiles;Phylum.Ochrophyta;Class.Bacillariophyta;Subclass.Bacillariophyta_X	0.80061
4668	Kingdom.Eukaryota;Supergroup.Stramenopiles;Phylum.Ochrophyta;Class.Bacillariophyta;Subclass.Bacillariophyta_X	0.721564
5322	Kingdom.Eukaryota;Supergroup.Stramenopiles;Phylum.Ochrophyta;Class.Bacillariophyta;Subclass.Bacillariophyta_X	0.850628
5560	Kingdom.Eukaryota;Supergroup.Stramenopiles;Phylum.Ochrophyta;Class.Bacillariophyta	0.817571
6059	Kingdom.Eukaryota;Supergroup.Stramenopiles;Phylum.Ochrophyta;Class.Bacillariophyta;Subclass.Bacillariophyta_X	0.933224
6621	Kingdom.Eukaryota;Supergroup.Stramenopiles;Phylum.Ochrophyta;Class.Bacillariophyta;Subclass.Bacillariophyta_X	0.783808
6666	Kingdom.Eukaryota;Supergroup.Stramenopiles;Phylum.Ochrophyta;Class.Bacillariophyta	0.999996
6829	Kingdom.Eukaryota;Supergroup.Stramenopiles;Phylum.Ochrophyta;Class.Bacillariophyta;Subclass.Bacillariophyta_X	0.852522
6995	Kingdom.Eukaryota;Supergroup.Stramenopiles;Phylum.Ochrophyta;Class.Bacillariophyta;Subclass.Bacillariophyta_X	0.73193
7363	Kingdom.Eukaryota;Supergroup.Stramenopiles;Phylum.Ochrophyta;Class.Bacillariophyta	0.999996
7592	Kingdom.Eukaryota;Supergroup.Stramenopiles;Phylum.Ochrophyta;Class.Bacillariophyta	0.999991
7757	Kingdom.Eukaryota;Supergroup.Stramenopiles;Phylum.Ochrophyta;Class.Bacillariophyta	0.953714
8008	Kingdom.Eukaryota;Supergroup.Stramenopiles;Phylum.Ochrophyta;Class.Bacillariophyta	0.999454
9868	Kingdom.Eukaryota;Supergroup.Stramenopiles;Phylum.Ochrophyta;Class.Bacillariophyta;Subclass.Bacillariophyta_X	0.775093
10225	Kingdom.Eukaryota;Supergroup.Stramenopiles;Phylum.Ochrophyta;Class.Bacillariophyta;Subclass.Bacillariophyta_X	0.877533
10243	Kingdom.Eukaryota;Supergroup.Stramenopiles;Phylum.Ochrophyta;Class.Bacillariophyta	0.999998
10583	Kingdom.Eukaryota;Supergroup.Stramenopiles;Phylum.Ochrophyta;Class.Bacillariophyta;Subclass.Bacillariophyta_X;Order.Surirellales;Suborder.Surirellales_X;Family.Surirellaceae;Genus.Psammodictyon;Species.Psammodictyon	0.754616
11368	Kingdom.Eukaryota;Supergroup.Stramenopiles;Phylum.Ochrophyta;Class.Bacillariophyta;Subclass.Bacillariophyta_X	0.889554
11469	Kingdom.Eukaryota;Supergroup.Stramenopiles;Phylum.Ochrophyta;Class.Bacillariophyta;Subclass.Bacillariophyta_X	0.844937
11986	Kingdom.Eukaryota;Supergroup.Stramenopiles;Phylum.Ochrophyta;Class.Bacillariophyta;Subclass.Bacillariophyta_X	0.743816
12097	Kingdom.Eukaryota;Supergroup.Stramenopiles;Phylum.Ochrophyta;Class.Bacillariophyta;Subclass.Bacillariophyta_X	0.848745
12198	Kingdom.Eukaryota;Supergroup.Stramenopiles;Phylum.Ochrophyta;Class.Bacillariophyta	0.999863
12882	Kingdom.Eukaryota;Supergroup.Stramenopiles;Phylum.Ochrophyta;Class.Bacillariophyta	0.999998
13370	Kingdom.Eukaryota;Supergroup.Stramenopiles;Phylum.Ochrophyta;Class.Bacillariophyta;Subclass.Bacillariophyta_X	0.786608
13578	Kingdom.Eukaryota;Supergroup.Stramenopiles;Phylum.Ochrophyta;Class.Bacillariophyta;Subclass.Bacillariophyta_X	0.856946
13693	Kingdom.Eukaryota;Supergroup.Stramenopiles;Phylum.Ochrophyta;Class.Bacillariophyta;Subclass.Bacillariophyta_X	0.809377
13717	Kingdom.Eukaryota;Supergroup.Stramenopiles;Phylum.Ochrophyta;Class.Bacillariophyta	0.999581
15103	Kingdom.Eukaryota;Supergroup.Stramenopiles;Phylum.Ochrophyta;Class.Bacillariophyta	0.924179
15442	Kingdom.Eukaryota;Supergroup.Stramenopiles;Phylum.Ochrophyta;Class.Bacillariophyta;Subclass.Bacillariophyta_X	0.921309
15805	Kingdom.Eukaryota;Supergroup.Stramenopiles;Phylum.Ochrophyta;Class.Bacillariophyta;Subclass.Bacillariophyta_X	0.830654
16834	Kingdom.Eukaryota;Supergroup.Stramenopiles;Phylum.Ochrophyta;Class.Bacillariophyta	0.787138
17229	Kingdom.Eukaryota;Supergroup.Stramenopiles;Phylum.Ochrophyta;Class.Bacillariophyta;Subclass.Bacillariophyta_X	0.760258
17631	Kingdom.Eukaryota;Supergroup.Stramenopiles;Phylum.Ochrophyta;Class.Bacillariophyta;Subclass.Bacillariophyta_X	0.768399
18800	Kingdom.Eukaryota;Supergroup.Stramenopiles;Phylum.Ochrophyta;Class.Bacillariophyta;Subclass.Bacillariophyta_X	0.74434
19256	Kingdom.Eukaryota;Supergroup.Stramenopiles;Phylum.Ochrophyta;Class.Bacillariophyta	0.999997
20284	Kingdom.Eukaryota;Supergroup.Stramenopiles;Phylum.Ochrophyta;Class.Bacillariophyta;Subclass.Bacillariophyta_X	0.844002
20305	Kingdom.Eukaryota;Supergroup.Stramenopiles;Phylum.Ochrophyta;Class.Bacillariophyta	0.999964
20338	Kingdom.Eukaryota;Supergroup.Stramenopiles;Phylum.Ochrophyta;Class.Bacillariophyta;Subclass.Bacillariophyta_X	0.831793
21053	Kingdom.Eukaryota;Supergroup.Stramenopiles;Phylum.Ochrophyta;Class.Bacillariophyta	0.999998
21207	Kingdom.Eukaryota;Supergroup.Stramenopiles;Phylum.Ochrophyta;Class.Bacillariophyta;Subclass.Bacillariophyta_X	0.941661
21213	Kingdom.Eukaryota;Supergroup.Stramenopiles;Phylum.Ochrophyta;Class.Bacillariophyta	0.796565
21724	Kingdom.Eukaryota;Supergroup.Stramenopiles;Phylum.Ochrophyta;Class.Bacillariophyta;Subclass.Bacillariophyta_X	0.876488
